# Supplementary material for: Binding of Rap1 and Riam to Talin1 Fine-Tune β2 Integrin Activity During Leukocyte Trafficking
Source: PubMed Central journal article supplement (PMC8417109; doi:10.3389/fimmu.2021.702345), 2021-08-19
Supplement: DataSheet_1.pdf [file DataSheet_1.pdf]

## Supplementary material

**Table S1:** Peripheral blood cell counts of WT, *Tln1*<sup>3mut</sup>, *Riam*<sup>-/-</sup> and double mutant (DM) mice (N=15/15/9/11). Values are given as mean ± 95% confidence interval.

|                                  | <b>WT (N=15)</b> | <b>Talin<sup>3mut</sup> (N=15)</b> | <b>Riam<sup>-/-</sup> (N=9)</b> | <b>DM (N=11)</b> |
|----------------------------------|------------------|------------------------------------|---------------------------------|------------------|
| <b>Platelets [K/μl]</b>          | 756 ± 129        | 726 ± 132                          | 758 ± 210                       | 627 ± 168        |
| <b>Mean platelet volume [fL]</b> | 6.68 ± 0.76      | 6.57 ± 0.59                        | 7.31 ± 0.76                     | 7.81 ± 0.87      |
| <b>White blood cells [K/μl]</b>  | 7.22 ± 1.31      | 7.98 ± 2.15                        | 13.51 ± 2.16                    | 14.46 ± 2.86     |
| <b>Neutrophils [K/μl]</b>        | 1.42 ± 0.46      | 1.06 ± 0.39                        | 3.08 ± 1.10                     | 3.22 ± 1.49      |
| <b>Lymphocytes [K/μl]</b>        | 5.57 ± 1.27      | 6.71 ± 1.78                        | 10.02 ± 1.66                    | 10.75 ± 2.37     |
| <b>Monocytes [K/μl]</b>          | 0.10 ± 0.05      | 0.08 ± 0.04                        | 0.05 ± 0.02                     | 0.15 ± 0.08      |
| <b>Eosinophils [K/μl]</b>        | 0.12 ± 0.05      | 0.13 ± 0.07                        | 0.35 ± 0.07                     | 0.33 ± 0.14      |
| <b>Basophils [K/μl]</b>          | 0.01 ± 0.01      | 0.01 ± 0.00                        | 0.00 ± 0.00                     | 0.01 ± 0.01      |
| <b>Red blood cells [M/μl]</b>    | 9.95 ± 0.28      | 10.01 ± 0.30                       | 10.60 ± 0.25                    | 10.10 ± 0.30     |
| <b>Hemoglobin [g/dL]</b>         | 14.97 ± 0.35     | 15.15 ± 0.46                       | 14.98 ± 0.29                    | 14.88 ± 0.56     |
| <b>Hematocrit [%]</b>            | 47.91 ± 1.46     | 48.91 ± 1.53                       | 48.88 ± 1.11                    | 48.05 ± 1.89     |

# Figure S1

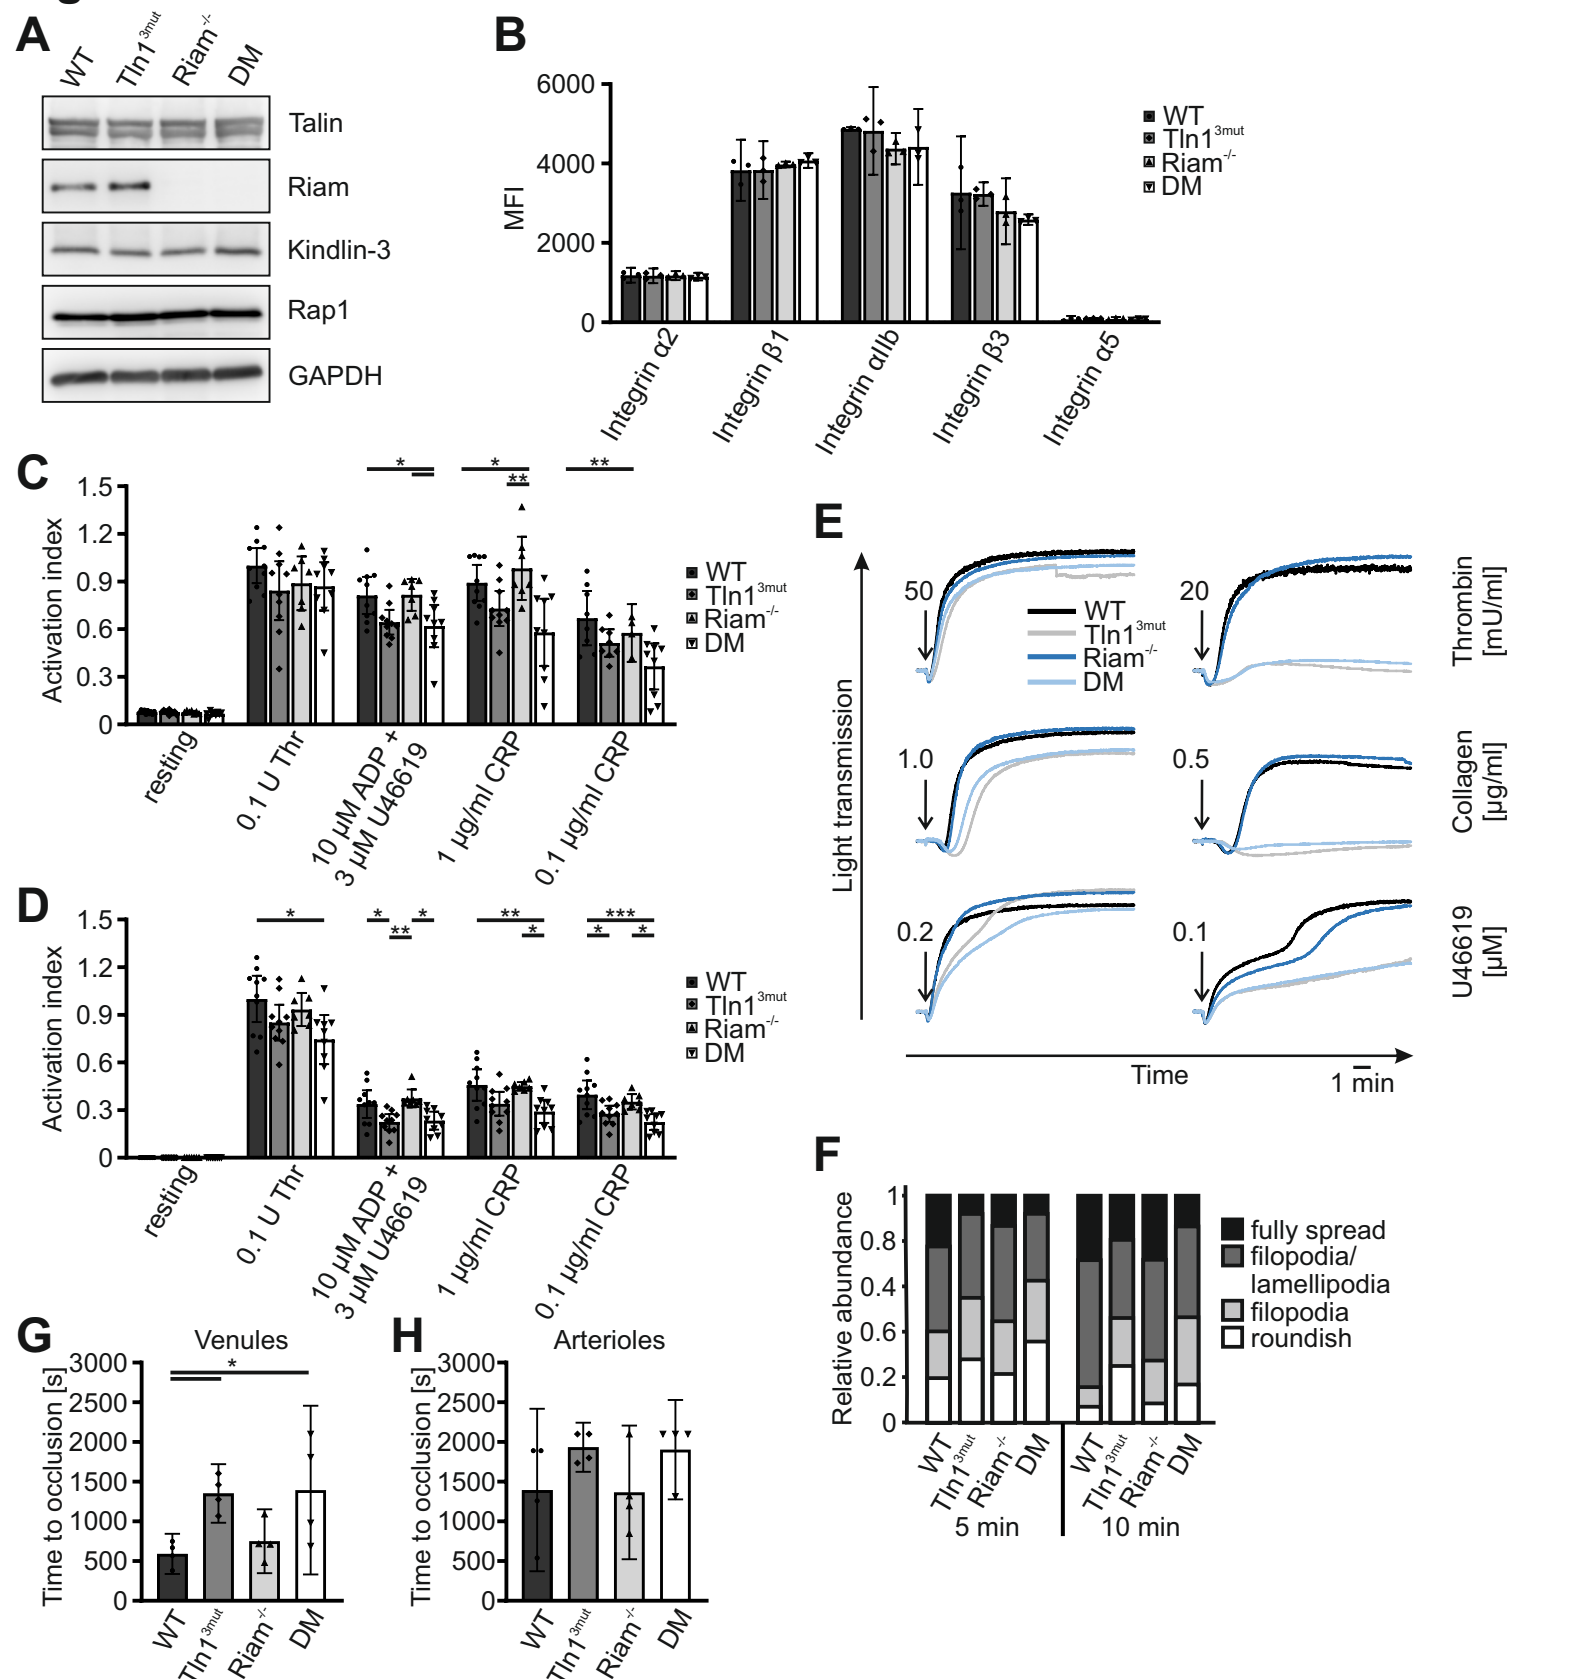

**Supplementary figure 1: Platelet integrins are regulated via the Rap1/talin pathway but not the Rap1/Riam/talin pathway.** (A) Western blots showing expression levels of Talin, Riam, kindlin-3 and Rap1 in WT, *Tln1*<sup>3mut</sup>, *Riam*<sup>-/-</sup> and DM platelets. GAPDH served as loading control. (B) Surface expression of integrin subunits  $\alpha 2$ ,  $\beta 1$ ,  $\alpha IIb$ ,  $\beta 3$  and  $\alpha 5$  on WT, *Tln1*<sup>3mut</sup>, *Riam*<sup>-/-</sup> and DM platelets measured by FACS analysis (N=3 mice). (C/D) Integrin  $\alpha IIb\beta 3$  activation on WT, *Tln1*<sup>3mut</sup>, *Riam*<sup>-/-</sup> and DM platelets in response to different agonists assessed by (C) active integrin  $\alpha IIb\beta 3$  specific JON/A antibody binding assay and (D) AlexaFluor647 labeled fibrinogen binding assay. Staining intensities were measured by FACS and normalized to total integrin  $\alpha IIb$  levels (N=10/10/7/9 mice in 3 experiments). (E) Platelet aggregation of WT, *Tln1*<sup>3mut</sup>, *Riam*<sup>-/-</sup> and DM platelets in response to thrombin, collagen and U46619 measured by densitometry. (F) Platelet spreading on fibrinogen coated surfaces in response to 0.01 U/ml thrombin after 5 and 10 min. Values represent the frequencies of platelets adopting a roundish shape, forming filopodia, forming filopodia and lamellipodia or being fully spread for each genotype. (G/H) Thrombus formation monitored by intravital microscopy of cremaster muscle venules (G) and arterioles (H) upon photochemical injury. Values represent the time from injury to complete blood vessel occlusion (N=4 mice). All values represent mean  $\pm$  95% confidence interval. Statistical significance was assessed using One-way ANOVA followed by Tukey's or Dunnett's (G/H) multiple comparison test. \*  $p < 0.05$ , \*\*  $p < 0.01$ , \*\*\*  $p < 0.001$ .

**Supplementary videos 1-4:** Representative videos from intravital microscopy of inflamed cremaster muscles of WT,  $Tln1^{3mut}$ ,  $Riam^{-/-}$  and DM mice 2 hours after  $TNF-\alpha$  injection, scale bars: 30  $\mu m$ .
